# Supplementary material for: A highly selective ratiometric fluorescent chemosensor for Cu(ii) based on dansyl-functionalized thiol stabilized silver nanoparticles
Source: Royal Society of Chemistry journal article supplement (doi:10.1039/c3tb00534h), 2013-01-01
Supplement: c3tb00534h.pdf [file c3tb00534h.pdf]

# A highly selective ratiometric fluorescent chemosensor for Cu(II) based on dansyl-functionalized thiol stabilized silver nanoparticles

Vairaperumal Tharmaraj and Kasi Pitchumani\*

School of Chemistry, Madurai Kamaraj University, Madurai-625021, Tamil Nadu.

*E-mail: pit12399@yahoo.com*

## CONTENTS

- 1) **Scheme 1** Synthesis of thiol stabilized silver nanoparticle
- 2) **Fig. S1**  $^1\text{H}$  NMR spectra of 2-(2-aminophenylthio)acetyl bromide (Ligand)
- 3) **Fig. S2**  $^{13}\text{C}$  NMR spectrum of 2-(2-aminophenylthio)acetyl bromide (Ligand)
- 4) **Fig. S3** IR spectrum of 2-(2-aminophenylthio)acetyl bromide (Ligand)
- 5) **Fig. S4** ESI-Mass spectrum of 2-(2-aminophenylthio)acetyl bromide (Ligand)
- 6) **Fig. S5**  $^1\text{H}$  NMR spectra of compound **1**
- 7) **Fig. S6** a) UV-Vis. spectra of thiol stabilized silver nanoparticles b) Fluorescence emission spectra of thiol stabilized silver nanoparticles
- 8) **Fig. S7** Powder XRD pattern of thiol stabilized silver nanoparticles in corresponding planes.
- 9) **Fig. S8** EDAX spectra of thiol stabilized silver nanoparticles
- 10) **Fig. S9** (a) Two-dimensional (2D) AFM image of thiol stabilized silver NPs. (b) Three-dimensional (3D) AFM image of thiol stabilized silver NPs.
- 11) **Fig. S10** UV-Vis. absorption selectivity studies of **1**
- 12) **Table S1.** Binding constants of **1** with other metal ions recorded at room temperature in ACN–H<sub>2</sub>O (1:1, v/v) mixture.

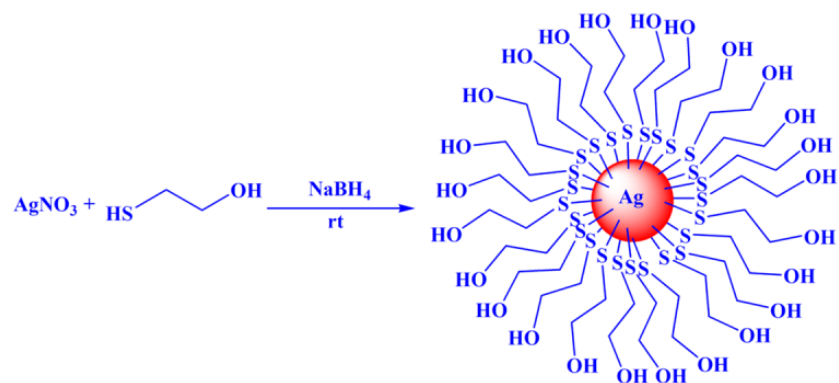

**Scheme 1** Synthesis of thiol stabilized silver nanoparticle

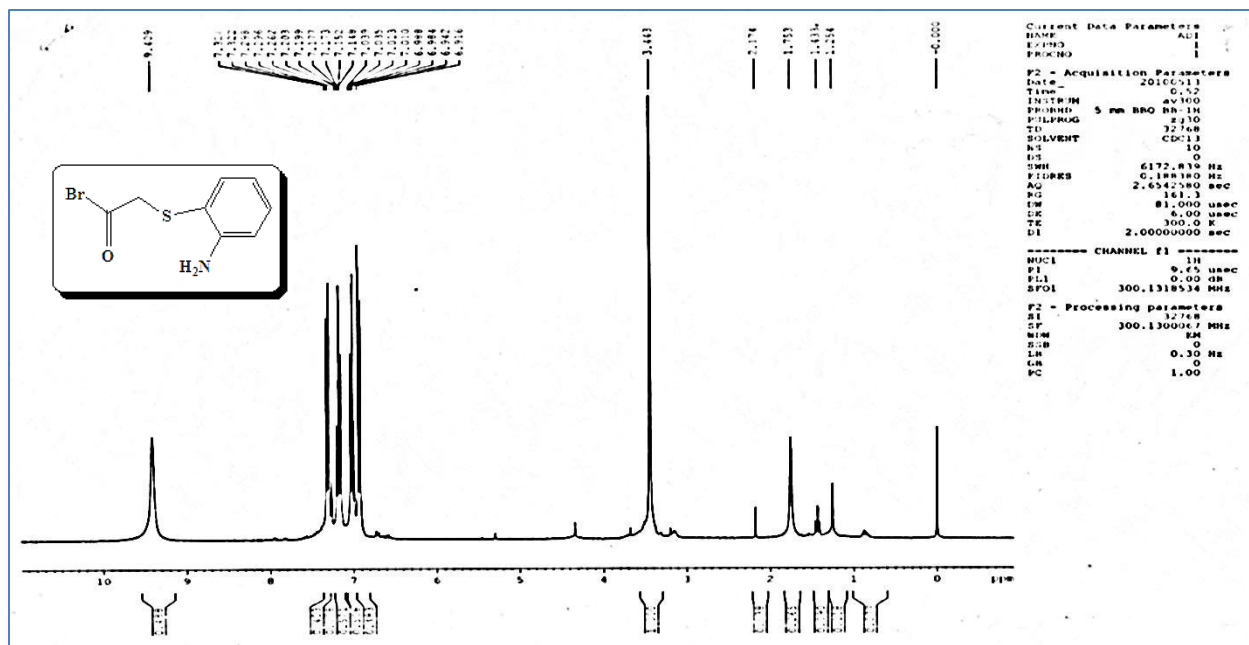

**Fig S1.** <sup>1</sup>H NMR spectrum of ligand [2-(2-aminophenylthio)acetyl bromide]

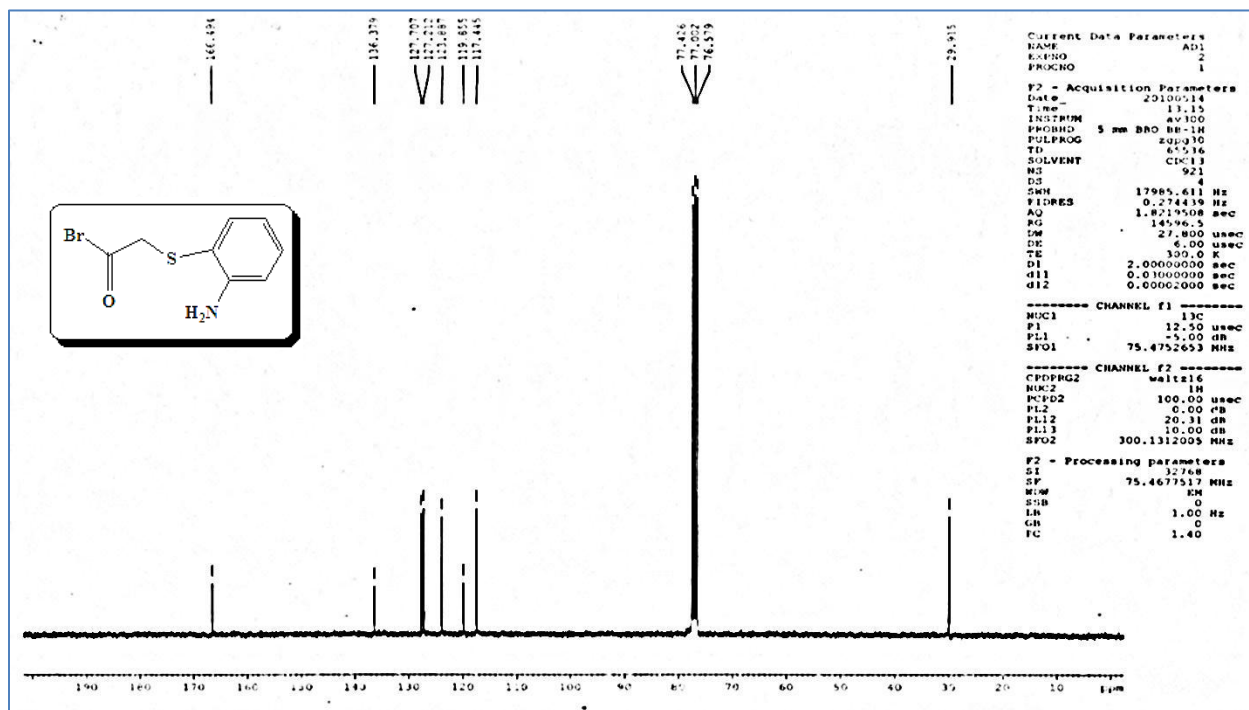

**Fig S2.** <sup>13</sup>C NMR spectrum of ligand [2-(2-aminophenylthio)acetyl bromide]

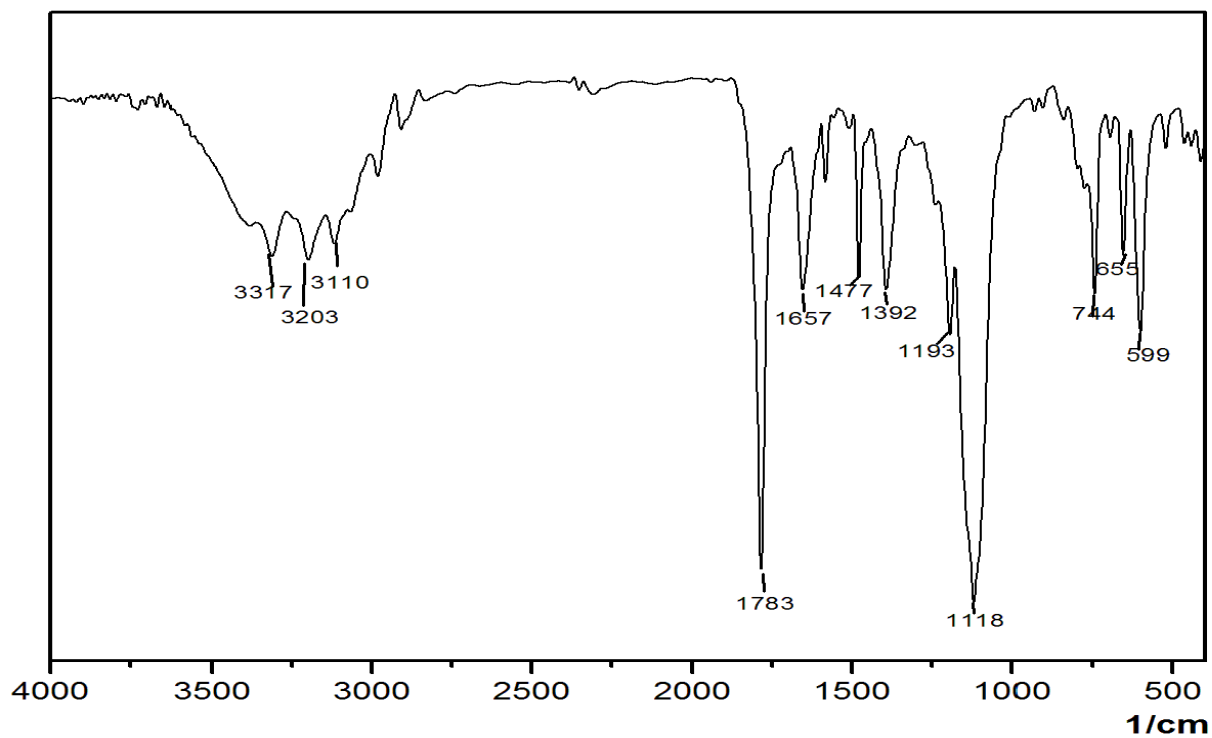

**Fig. S3** IR spectrum of ligand [2-(2-aminophenylthio)acetyl bromide]

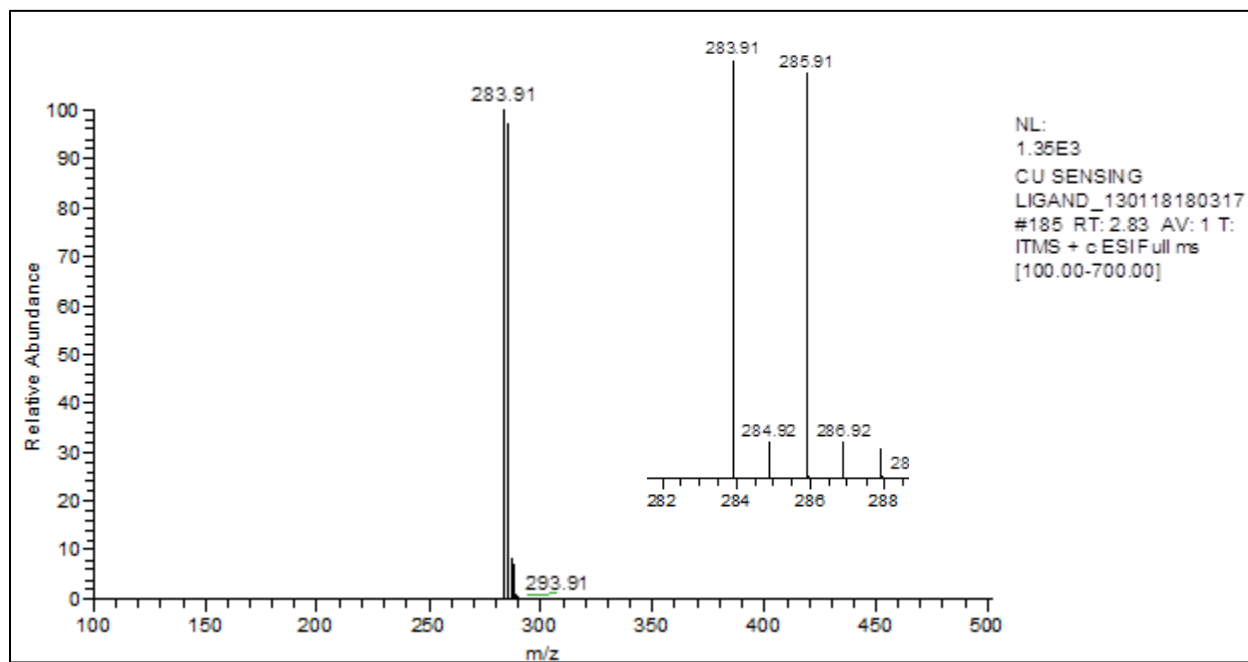

**Fig. S4** ESI-MS spectrum of ligand [2-(2-aminophenylthio)acetyl bromide]



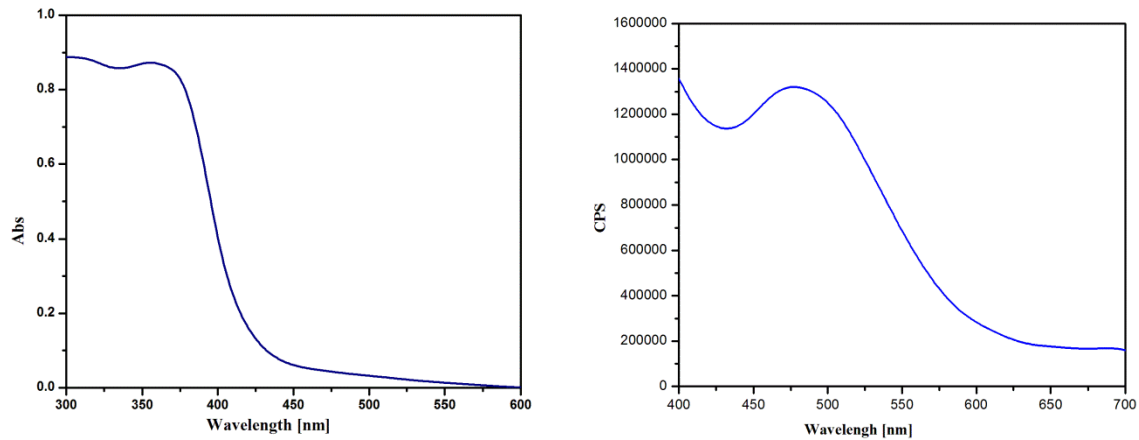

**Fig. S6** a) UV-Visible spectra of silver nanoparticles b) Fluorescence emission spectra of silver nanoparticles

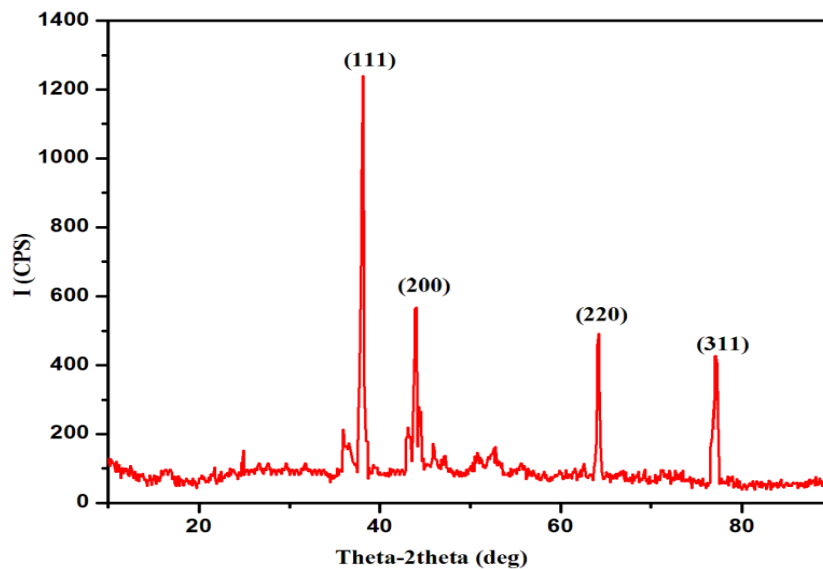

**Fig. S7** Powder XRD pattern of thiol stabilized silver nanoparticles in corresponding planes.

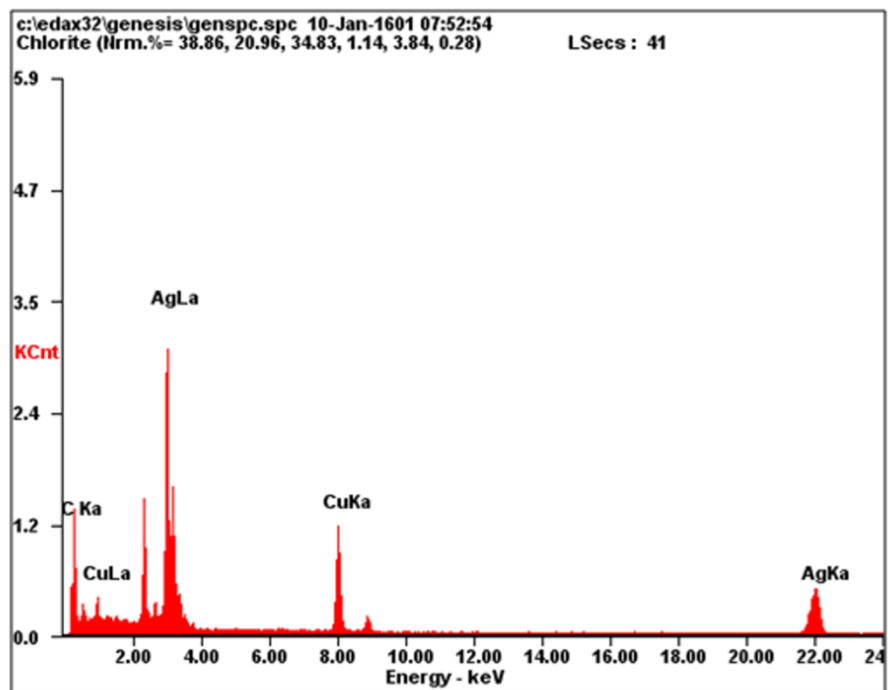

| <i>Elem</i> | <i>Weight %</i> | <i>Atomic %</i> |
|-------------|-----------------|-----------------|
| <i>C K</i>  | 20.90           | 66.30           |
| <i>Cu K</i> | 23.40           | 14.00           |
| <i>Ag K</i> | 55.70           | 19.70           |

**Fig S8.** EDAX spectra of silver nanoparticles

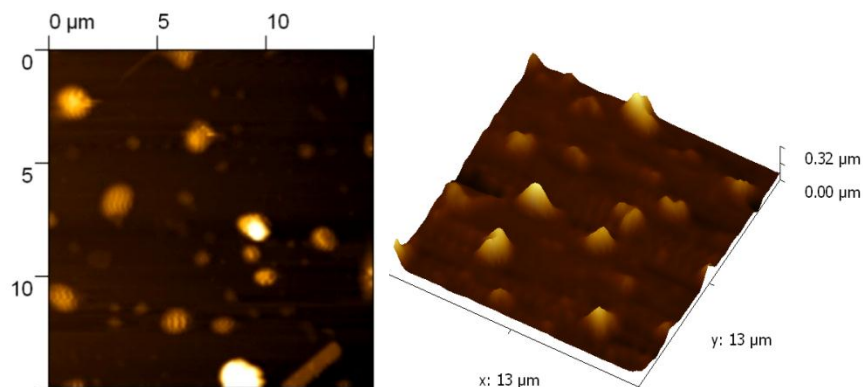

**Fig. S9** (a) Two-dimensional (2D) AFM image of thiol stabilized silver NPs. (b) Three-dimensional (3D) AFM image of thiol stabilized silver NPs.

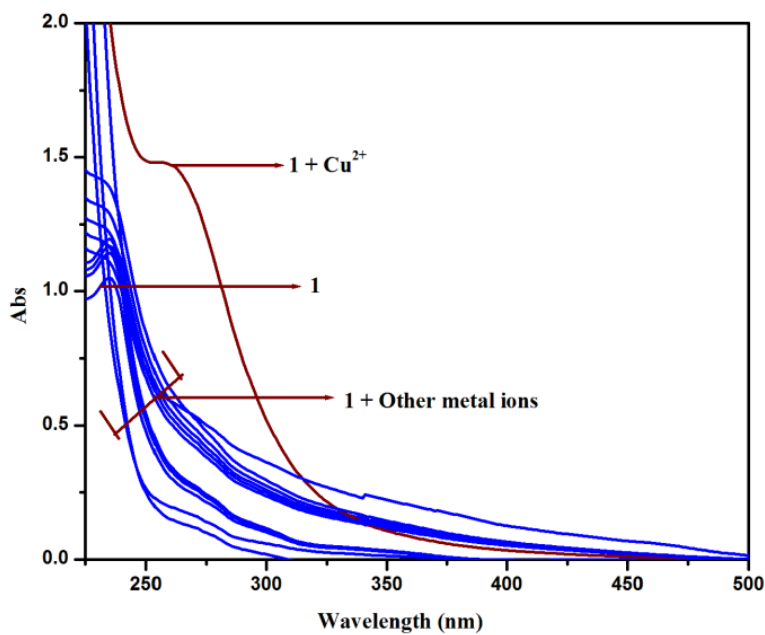

**Fig. S10** UV-Vis. spectra of compound **1** in the presence of Cu<sup>2+</sup> and various metal ions ( $5 \times 10^{-6}$  mol L<sup>-1</sup> Na<sup>+</sup>, K<sup>+</sup>, Li<sup>+</sup>, Ag<sup>+</sup>, Ba<sup>2+</sup>, Cd<sup>2+</sup>, Co<sup>2+</sup>, Fe<sup>2+</sup>, Hg<sup>2+</sup>, Mn<sup>2+</sup>, Ni<sup>2+</sup>, Pb<sup>2+</sup> and Zn<sup>2+</sup> at pH 7.4 (phosphate buffer 10 mM) in CH<sub>3</sub>CN:H<sub>2</sub>O (1:1 v/v).



**Table S1.** Binding constants of **1** with other metal ions recorded at room temperature in ACN–  
H<sub>2</sub>O (1:1, v/v) mixture.

| <b>Metal ions</b> | <b>Binding constant values (M<sup>-1</sup>)</b> |
|-------------------|-------------------------------------------------|
| Na <sup>+</sup>   | 1025                                            |
| K <sup>+</sup>    | 1207                                            |
| Li <sup>+</sup>   | 1401                                            |
| Ag <sup>+</sup>   | 3103                                            |
| Cu <sup>2+</sup>  | 8345                                            |
| Ba <sup>2+</sup>  | 2105                                            |
| Cd <sup>2+</sup>  | 2414                                            |
| Co <sup>2+</sup>  | 1928                                            |
| Fe <sup>2+</sup>  | 3255                                            |
| Hg <sup>2+</sup>  | 2751                                            |
| Mn <sup>2+</sup>  | 2361                                            |
| Ni <sup>2+</sup>  | 3976                                            |
| Pb <sup>2+</sup>  | 3625                                            |
| Zn <sup>2+</sup>  | 3832                                            |
